# Supplementary material for: Cell-intrinsic ceramides determine T cell function during melanoma progression
Source: eLife journal article supplement (doi:10.7554/elife.83073), 2022-11-15
Supplement: fig1-data1 [file Figure 1 - Figure supplement 1 - Source data.xlsx]

## Sheet: Tabelle1
Figure 1-figure supplement 1A
days	PBS											Ami
7	29.4	21.6	28.2		36.8	69.1						24	42.6	77.2	60.7	75.1
8	25.9	34.2	27.7		56	29.4	44.4	66.3	59.6	36.3		44.4	46.5	56	67.2	133.2	47.6	77.2	73
9	44.1	28.8	44.8		113.6	21.5	89.7	165.05	106.7	57.55		63.8	58.8	104	66	180.8	77.6	209.7	136.4
10	72	32.2	45.9		125	40	135	263.8	153.8	78.8	90.6	75.8	80.2	109.8	82.9	264.6	107.6	342.2	199.8
11	98.3	23.1	65.2	12.4	350.5	51.8	191.1	535	211.9	231.2	180.9	125	104.3	185	117.2	379.5	159	397.8	286.9
12	93.6	22.5	118.1	9.4	426.5	37.3	240.1	595.4	520.2	196.5	191.8	150	141	227.8	132.9	585.8	185.1	641.5	515
13	187.3	35.2	136.1	25.4	681.4	72.6	391.1	534.6	403.4	147.9	237.3	243.4	163.8	304	144	895.4	345	683.2	898.1
Figure 1-figure supplement 1B
%CD44 of CD4+ T cells		%CD44 of CD8+ T cells			%Ifng of CD4+ T cells		%Ifng of CD8+ T cells			MFI Ifng of CD4+ T cells		MFI Ifng of CD8+ T cells
PBS Tumor	Ami Tumor	PBS Tumor	Ami Tumor		PBS Tumor	Ami Tumor	PBS Tumor	Ami Tumor		PBS Tumor	Ami Tumor	PBS Tumor	Ami Tumor
70.1	40.4	71.2	50		11.9	6.5	15.4	12.7		660	559	3103	1995
68.6	74.5	77.1	93.1		11.7	20.4	20.3	27.1		558	824	2428	4358
77.2	81.6	70.4	78.7		19.4	9.8	16.3	9		1067	498	1492	3153
93.2	34.1	94.5	60.2		39.4	10.5	25.4	14.5		2333	462	10411	2026
84.6	78.7	91.4	61.8		38.4	5.6	20.3	13		1597	289	2213	3241
88.1	74.8	86	51.9		33.5	15.2	62.6	39.2		1805	718	10740	10053
83.2	65.8	63.5	37.1		12.1	5.8	30.7	23.6		485	253	4118	3002
88.9	69.4	73	47.9		32.9	5.5	52.5	40.4		1965	748	13337	2928
94.5		86.3			18.6		67			1339		10864
