# Supplementary material for: Cell-intrinsic ceramides determine T cell function during melanoma progression
Source: eLife journal article supplement (doi:10.7554/elife.83073), 2022-11-15
Supplement: fig1-data1 [file Figure 1 - Source data.xlsx]

## Sheet: Tabelle1
Figure 1A
days	Asm-WT																	Asm-Ko
6		110.3	90.6	30.1	67.2	57.6	49.9	104.1	62.8	40.8	52.7	41.6		110.3	90.6	30.1	67.2	102.3	106	83.2	35.5	52.3	177.3	140	98.3	78.4	61.6	61.6	81.8
7						82.2	76.3	130.1	147.9	84.5	82.5	72.1											194.4	124.4	117.3	184.3	90.3	78.4	125.4
8	31.5	183.8	179.6	74.9	88.9	115.7	92.2	353.2	177.6	119.5	55	79	31.5	183.8	179.6	74.9	88.9	259.2	106.7	134	139.2	124.5	366.3	205.9	336.8	178.6	196.9	135.8	180.1
9	43.8	303.8	182.3	65	180.8	226.6	94.9	470.6	275.7	176.8	85.2	124	43.8	303.8	182.3	65	180.8	426.3	234.4	367.4	208.1	278.4	601.9	287.5	475.7	348.2	265.9	209.1	277.2
10	129.2	301.1	399.6	64.7	292	228.2	173.3	729	508.6	274.4	282.1	183	129.2	301.1	399.6	64.7	292	740.6	173	546.5	269.5	333.3	744.7	656	870.3	448.6	541.5	320.3	525.3
11	228.9	522.5	632.5	215.3	483.2	350.9	293.7	879.7	764.2	389.6	355.1	198.1	228.9	522.5	632.5	215.3	483.2	879.9	269.8	416.8	371.1	541.7	1273.2	929.5	1326.5	679.5	655.6	607.9	687.3
12	355.9	677.1	859.1	258.6	631.8	473.7	414.2	1030.5	1019.8	504.8	428.1	213.2	355.9	677.1	859.1	258.6	631.8	1429.2	520.1	674.6	616.3	635.9	1801.6	1203.1	1782.7	910.3	769.6	895.4	849.2
13	413.5	830	1007.2	272.2	337.9	577.6	549.2	1545.7	1485.4	744.2	729	605.3	413.5	830	1007.2	272.2	337.9	1749.6	703.9	949.5	1091.1	974.2	2231.8	1513.8	2288.6	1214.7	1076.5	1209.6	1647.3
Figure 1B
CD4+ T cells of viable					Foxp3+ of CD4+ T cells					CD8+ T cells of viable
WT dLN	KO dLN	WT Tumor	KO Tumor		WT dLN	KO dLN	WT Tumor	KO Tumor		WT dLN	KO dLN	WT Tumor	KO Tumor
31.4	26.3	9.1	6.1		11.7	16.5	23.1	45.8		20.4	23.2	5.2	4.8
32.7	21.9	8.8	12.8		14	17.7	14.6	34.8		25.8	19.5	5.4	5.6
27	20.5	7.7	7		12.8	18.4	11.5	47.5		23.7	18.5	5.8	7.5
29	10.4	15.4	22		10.1	14.6	26.6	40.6		29.8	8.1	5.3	5.6
24.9	25.1	17.1	6.4		8.6	26.1	32.4	56		26.3	20.8	8.2	15.7
27.8	33.6	14.3	7.4		9.9	20	32.6	30.4		20.2	25.4	12.8	4.4
35.3	21.6	7.5	15.7		15.5	19.7	45.5	36		42.1	20.5	4.4	5.1
25.9	28.3	18.1	6.3		16.9	15.1	33.1	28.7		27.8	30.7	6.6	8
41.2	21.6	29.9	12.6		14.7	12.4	29.7	41.5		30.5	24.3	9.1	5.1
24	11.7	3.9	14.1		11.2	18.3	25.6	40.8		22.2	10.6	12.1	9.2
33.7	27.9	8.3	7.4		12.3		9.8			22	20.6	2.1	11.8
22.3		5.2	19.1		14		19.4			19.4		4.2	2.2
					17.4		43.5					3	12.5
					18.4		32.7
Figure 1C
%Ifng of CD4+ T cells		%Ifng of CD8+ T cells			MFI Ifng of CD4+ T cells		MFI Ifng of CD8+ T cells			%CD44 of CD4+		%CD44 of CD8+
WT Tumor	KO Tumor	WT Tumor	KO Tumor		WT Tumor	KO Tumor	WT Tumor	KO Tumor		WT Tumor	KO Tumor	WT Tumor	KO Tumor
14.4	13.7	19.3	10.6		231	138	446	203		59.1	88.3	41	74.3
15.5	6.8	12.8	10.3		263	34	309	272		85.6	96.4	60.3	82.6
8.9	14	9.4	14.6		134	136	187	289		37.9	85.1	39.5	47.9
14.4	18.3	10.6	11.4		273	311	333	495		73.7	81	50	36.8
17.5	9.7	15.8	9.7		354	418	574	398		51.9	82.2	15.9	58.1
19.5	10.9	15.4	9		298	76	269	176		66.8	64	37.1	28.5
15.7	16.1	14.8	26.4		278	130	347	170		82	76	61.8	36.8
11	5.9	12.2	13.3		132	135	299	999		76.3	48	72.8	20.5
13.7	20.6	22.4	17.5		583	337	1897	714		62.9	66.7	39.8	28.7
11.5	4.3	32.6	3.4		1332	216	2487	229		49	46.2	22.3	19.4
6.4	6.9	24.2	19		490	546	1423	1367		81.1	62.2	72.7	32.6
2.7	2.7	10.6	12.8		362	246	579	702		77.9	18.5	66.1	12.9
8	1.7	21.7	14.2		640	256	963	735		55.6	66	51.4	58.5
7.8		18.4			650		1800			45.6	63.9	37.8	43.6
										87	75.3	80.7	35.9
										69.8	52.9	54.5	29.7
										61.5	66	71.6	48.2
										89.4	75.8	83	34.6
										31.1	35.6	34.7	34.5
										32.3		31
										79.1		69.4
										77.8		77.8
Figure 1 D			Figure 1 E
Foxp3+ of CD4+ T cells			Foxp3+ of CD4+ T cells
Asm-wt	Asm-ko		ctrl		iTregs
17.4	27.1		Asm-wt	Asm-ko	Asm-wt	Asm-ko
24.6	34.7		0.6	1.1	51.2	70.4
19.6	32.2		0.5	2.3	37	69.6
19.3	19.8				26.2	82.1
20.2	30.4					73.2
12.7	25
18	21.8
13	19.6
15.3	23.8
15.6	21.2
14.6	29.3
15.8	29.7
12.8	28
14.5	18.3
15.8	19.6
13.5	16.4
	20.9
