# Supplementary material for: Cell-intrinsic ceramides determine T cell function during melanoma progression
Source: eLife journal article supplement (doi:10.7554/elife.83073), 2022-11-15
Supplement: fig3-data1 [file Figure 3 - Figure supplement 1 - Source data.xlsx]

## Sheet: Tabelle1
Figure 3-figure supplement 1A
	WT								Asm/CD4cre
0'	2.72197	0.424956	0.247095	0.605975	0.888467	1.08114	1.0149	1.0155	0.0112793	0.129181	0.0198826		0.161401	0.209272	0.027843	0.086273
30'	2.00105	1.54611	0.439542	0.634083
60'	1.51175	1.69495	1.98097	2.09496
24h	1.73009	2.27741	1.66403	1.71176	0.321092	0.377722	0.346903	0.479673	0.0212713	0.0382977	0.539875	0.0342441	0.077009	0.047597	0.009608	0.00237
48h	2.57238	1.18771	1.9834		0.746738	0.63778	0.668099	0.533853	0.0400719	0.513616			0.076457	0.161257	0.009347	0.020786
Figure 3-figure supplement 1B
	ctrl								CD3/CD28
	WT				Asm/CD4cre				WT				Asm/CD4cre
Cer16	2.607	2.428	2.615	2.263	1.886	2.034	1.778	1.892	2.381	2.064	2.158	2.713	1.682	1.767	1.58	1.737
Cer18	1.316	1.445	1.217	0.981	0.711	1.057	0.824	0.809	1.086	1.187	1.14	0.919	0.606	0.888	0.695	0.583
Cer20	0.773	0.881	0.746	0.618	0.365	0.51	0.399	0.448	0.864	1.009	0.857	0.766	0.471	0.76	0.534	0.434
Cer22	1.025	1.159	1.1	0.871	0.592	0.716	0.559	0.741	1.944	2.094	1.716	1.637	1.04	1.348	1.021	1.034
Cer24	1.6	1.687	1.527	1.149	0.913	1.153	0.818	1.05	3.912	3.323	3.081	3.498	1.903	2.448	1.536	2.41
Cer24:1	3.216	3.153	3.045	2.232	1.821	2.087	1.53	1.718	4.188	4.122	3.428	3.188	2.232	3.188	2.478	1.712
Total Cer	10.537	10.755	10.249	8.115	6.288	7.557	5.908	6.658	14.375	13.798	12.38	12.722	7.935	10.4	7.844	7.911
Figure 3-figure supplement 1C
Th0		iTreg
WT	Asm/CD4cre	WT	Asm/CD4cre
0.6	0.2	41.6	36.2
1.9	0.4	35.6	54.5
1.5	7.5	61.6	64.8
2.1	3.6	34.5	68
0.3	0.4	41.5	58.8
0.4	0.4	30.9	51.5
0.7		22.9
Figure 3-figure supplement 1D
Th0		Th1
WT	Asm/CD4cre	WT	Asm/CD4cre
6.2	17.5	83.75
16.2	2.05	87.1	77.5
1.95	1.75	78.35	86.4
10.3	0.8	86.95	69.4
5.5	4.7	85.6	70.9
9.6	7.3	83.5	69.3
