# Supplementary material for: Cell-intrinsic ceramides determine T cell function during melanoma progression
Source: eLife journal article supplement (doi:10.7554/elife.83073), 2022-11-15
Supplement: fig3-data1 [file Figure 3 - Source data.xlsx]

## Sheet: Tabelle1
Figure 3A
	WT								Asm/CD4cre
0'	0.856553	0.762302	1.49245	0.888694	1.76481	1.06092	0.518156	0.65611	0.011391	0.075935	0.007972	0.025844
30'	0.738145	0.80215	0.943344	0.950302
60'	1.15232	0.692926	1.06334	0.930695
24h	1.07666	0.735385	0.849673		0.366859	0.442872	0.361592	0.457459	0.007213	0.006402	0.005683	0.006704
48h	0.938175	1.04361	1.063		0.350719	0.33509	0.593614	0.412954	0.023294	0.065639	0.014933	0.015004
Figure 3 B
	ctrl								CD3/CD28
	WT				Asm/CD4cre				WT			Asm/CD4cre
Cer16	1.861	1.493	1.759	1.432	1.374	1.561	1.62	1.777	5.278	2.823	2.408	1.333	2.277	1.542	1.468
Cer18	0.927	0.878	0.916	0.788	0.617	0.635	0.704	0.733	1.158	0.846	0.801	0.699	0.852	0.642	0.552
Cer20	0.564	0.473	0.589	0.468	0.342	0.432	0.445	0.461	0.761	0.641	0.661	0.637	0.764	0.562	0.503
Cer22	0.988	0.956	1.131	1.032	0.586	0.738	0.645	0.917	2.408	1.661	1.737	1.692	2.366	1.19	1.398
Cer24	1.463	1.364	1.71	1.536	0.828	1.09	0.944	1.207	6.697	3.745	3.403	2.368	4.67	2.01	2.148
Cer24:1	2.474	1.955	2.31	1.985	1.175	1.964	1.47	1.807	4.402	3.146	3.474	2.822	4.069	2.043	2.686
Total Cer	8.278	7.119	8.415	7.242	4.921	6.42	5.829	6.904	20.704	12.862	12.483	9.552	14.998	7.989	8.755
Figure 3C
CD25 of CD8+				CD69 of CD8+				CD44 of CD8+
ctrl		CD3/CD28		ctrl		CD3/CD28		ctrl		CD3/CD28
WT	Asm/CD4cre	WT	Asm/CD4cre	WT	Asm/CD4cre	WT	Asm/CD4cre	WT	Asm/CD4cre	WT	Asm/CD4cre
2.1	2.2	63.6	62.4	0.3	0.3	41.5	44.8	10.4	18.7	42.9	41.2
2.4	2.1	65	62.3	0.1	0.1	50.3	44.9	20.8	12.1	50.3	37.9
1.2	2.4	64.8	41.6	1.6	0.1	70.2	24.5	22.7	11.1	72.4	23.5
1.5	1.8	63.6	30.5	1.5	1.8	70.2	36.5	45.3	46.2	74.8	59.8
1.1	1.9	63.3	31.5	0.8	2.3	81.9	34	49.3	41.2	55.9	57.4
0.6	0.7	52.3	47	0.6	0.5	74	70	24.3	15.6	51.2	39.6
	0.8		47.5		0.5		68	22.6	20.9		40.3
Figure 3D
WT	Asm/CD4cre
100	61.4
99.5	62.3
83.2	94.9
117.3	100.1
90.6	28.5
109.4	90.3
	59.4
Figure 3E
ctrl		24h CD3/CD28		48h CD3/CD28
WT	Asm/CD4cre	WT	Asm/CD4cre	WT	Asm/CD4cre
0.1	0.1	38.4	60.8	86.6	88.1
0.1	0.1	51.7	32.1	84.1	83.85
0.1	0	64.5	21.7	90.8	58.1
0	0	47.9	0.7	97.1	16.3
0	0	14.7	15.6	92.3	83.9
	0	25.8	13		88.4
		36.8	19.5
		27.4	26
			9.2
Figure 3F
ctrl		ctrl		48h CD3/CD28		48h CD3/CD28
WT	WT	Asm/CD4cre	Asm/CD4cre	WT	WT	Asm/CD4cre	Asm/CD4cre
-	+	-	+	-	+	-	+	C16 Cer
0	0	0	0	49.9	40.8	28.1	33.1
0	0	0	0	48.9	49.5	20	42.5
0	0.2	0	0	43.6	49.2	28.5	40.3
0.1	0.1	0.1	0.1	43.6	43.4	22.8	32.1
