# Supplementary material for: Cell-intrinsic ceramides determine T cell function during melanoma progression
Source: eLife journal article supplement (doi:10.7554/elife.83073), 2022-11-15
Supplement: fig6-data1 [file Figure 6 - Figure supplement 1 - Source data.xlsx]

## Sheet: Tabelle1
Figure 6-figure supplement 1A
	Ac WT				Ac/CD4cre
0'	1.12888	0.831425	1.10179	0.937908	0.241287		0.0914323	0.0642142
30'	0.892707	0.802596	1.00745	0.797698
60'	0.952435	0.588726	0.918879	0.867768
24h	1.34414	1.03718	1.37872	0.960577	0.0386412	0.0497218	0.0467673	0.0330523
48h	1.90374	1.69903	1.60456		0.0987779	0.0754341	0.0188044	0.0187011
Figure 6-figure supplement 1B
	ctrl								CD3/CD28
	WT				Ac/CD4cre				WT				Ac/CD4cre
Cer16	1.219	1.561	1.322	1.872	2.555	2.74	2.396	2.806	2.079	2.812	2.844	2.32	5.705	8.28	5.86	7.203
Cer18	0.593	0.729	0.637	0.988	1.176	1.261	1.007	1.332	0.897	0.974	0.879	0.793	2.094	2.379	1.877	2.274
Cer20	0.305	0.362	0.35	0.721	0.619	0.697	0.621	0.693	0.644	0.668	0.635	0.602	1.279	1.329	1.097	1.335
Cer22	0.412	0.482	0.452	0.686	0.815	0.966	0.928	1.148	1.154	1.408	1.422	1.338	2.433	3.176	2.29	2.585
Cer24	0.591	0.781	0.771	1.197	1.069	1.242	1.341	1.406	2.044	3.397	3.165	2.725	2.652	4.07	2.659	2.917
Cer24:1	0.892	1.124	1.085	1.29	1.944	2.247	2.203	2.586	2.281	2.827	2.673	2.535	4.612	5.987	4.174	5.025
Total Cer	4.012	5.038	4.617	6.755	8.178	9.153	8.496	9.972	9.1	12.086	11.618	10.313	18.775	25.222	17.957	21.339
Figure 6-figure supplement 1C
p-ZAP70+ of CD4+ZAP70+				p-PLCg+ of CD4+
0'		5' CD3/CD28		0'		CD3/CD28
WT	Ac/CD4cre	WT	Ac/CD4cre	WT	Ac/CD4cre	WT	Ac/CD4cre
2.6	2.9	7.5	11.3	8.4	7.5	13.7	23.4
3.4	2.9	7.3	8.5	8.9	7.7	12.4	14.9
4.1	3.1	9.1	11	11.7	10.6	15.2	17.3
3.5	4.3	8.9	13.2	10.5	10.8	13.2	18.1
2.7	6.8	5.6	7.8
3.7	5.6	6.6	11.3
4.6		6.9
Figure 6-figure supplement 1D
IFNg of CD4+ [%]					grzmB of CD4+ [%]
Th0		Th1			Th0		Th1
WT	Ac/CD4cre	WT	Ac/CD4cre		WT	Ac/CD4cre	WT	Ac/CD4cre
1	2.6	98.8	99.1		2	5.8	14	20.85
1.1	2.6	98.95	98.95		2.9	7.7	19.1	20.2
3.3	0.9	97.45	98.5		6.6	4.7	16.3	18.2
17.6	5.9	71.7	71.3		14.9	25.2	24.45	31.75
21.6	25.2	75.5	61.7		12.9	13.6	20.15	24.1
10.3	21.2	73.4	63.2		19.1	9.8	22.25	29.95
7.7	7.7	98.65	96.8		5.8	16.7	7.5	31.5
22.2	3.6	98.3	96.55		10.2	9	22.65	28.15
12.8	20.2	94.8	97.4		7.8	12.3	18.8	43.3
