# Supplementary material for: Cell-intrinsic ceramides determine T cell function during melanoma progression
Source: eLife journal article supplement (doi:10.7554/elife.83073), 2022-11-15
Supplement: fig6-data1 [file Figure 6 - Source data.xlsx]

## Sheet: Tabelle1
Figure 6A
	WT				Ac/CD4cre
0'	1.20724	0.956009	1.08844	0.748304	0.150499	0.23243	0.159042	0.0176632
30'	0.874826	0.989834	0.881235	0.998482
60'	0.788719	0.803259	0.587871	1.06364
24h	2.02744	1.67041	1.55018	1.62508	0.0321654	0.377811
48h	1.37211	1.53373	1.67214		0.124462	0.0733174	0.0201169
Figure 6B	ctrl								CD3/CD28
	WT				Ac/CD4cre				WT				Ac/CD4cre
Cer16	1.278	1.201	1.265	1.621	2.644	2.154	2.149	2.746	2.271	2.506	2.668	2.574	9.354	8.72	7.734	7.519
Cer18	0.679	0.716	0.714	0.782	1.077	0.917	0.86	1.053	0.799	0.745	0.792	0.725	2.31	2.091	2.086	2.144
Cer20	0.45	0.383	0.407	0.471	0.715	0.636	0.554	0.713	0.682	0.628	0.61	0.656	1.342	1.245	1.301	1.453
Cer22	0.736	0.734	0.703	1.013	1.317	1.054	0.979	1.228	1.837	1.697	1.647	1.582	3.14	3.058	2.964	3.573
Cer24	1.089	1.182	1.078	1.391	1.668	1.442	1.304	1.584	2.918	3.133	2.961	2.663	3.932	4.067	3.506	3.581
Cer24:1	1.387	1.352	1.271	1.965	2.56	1.864	1.719	2.169	3.439	3.189	2.917	2.912	5.744	5.238	4.982	6.149
Total Cer	5.619	5.568	5.436	7.243	9.98	8.067	7.565	9.492	11.945	11.898	11.595	11.112	25.821	24.419	22.572	24.418
Figure 6C
p-ZAP70+ of CD8+ZAP70+				p-PLCg+ of CD8+
0'		5' CD3/CD28		0'		CD3/CD28
WT	Ac/CD4cre	WT	Ac/CD4cre	WT	Ac/CD4cre	WT	Ac/CD4cre
5.4	4.4	11.4	16.1	6.5	5.7	10.4	19.1
7.7	6.6	11	12.4	7.2	7	9.5	13.2
8.1	6.9	11.8	15.2	9.4	8.2	11.3	14.8
8.1	7	11.8	16.9	9.1	8.9	10.1	14.3
Figure 6D
WT	Ac/CD4cre
0.28	0.43
0.35	0.36
0.32	0.38
Figure 6E
Granzyme B of CD8+ [%]							Granzyme B of CD8+ [MFI]
ctrl		24h CD3/CD28		48h CD3/CD28			ctrl		24h CD3/CD28		48h CD3/CD28
WT	Ac/CD4cre	WT	Ac/CD4cre	WT	Ac/CD4cre		WT	Ac/CD4cre	WT	Ac/CD4cre	WT	Ac/CD4cre
0.5	0.5	10.2	21.6	36.1	60.9		308	324	1938	2821	5433	11693
0.9	0.1	23.2	13.3	48.5	53		370	262	5346	1066	3162	9288
0.3	0.2	9.7	10	39.6	40.2		423	375	1313	1025	2269	3517
0.2	2.3	3.9	5	49.3	65.9		408	563	679	704	4057	6187
0.7	0.7	1.6	1.7	70.3	45.8		466	496	556	525	5636	4068
		19.6	37.8	61.8	75.1				1413	2474	4621	7715
		11.6	27.1		78.2				1011	1827		8542
			29.5		73.1					2094		8133
Figure 6F
WT/OTI	Ac/CD4cre/OTI
100.7	106.7
96.5	109.6
102.7	101.8
97	103
105.6	97.8
97.3	103
92.1	240.3
168.7	205.3
39.1
