# Supplementary material for: Cell-intrinsic ceramides determine T cell function during melanoma progression
Source: eLife. 2022 Nov 25;11:e83073. doi: 10.7554/eLife.83073 (PMC9699697; doi:10.7554/eLife.83073)
Supplement: Figure 2—source data 1. [file elife-83073-fig2-data1.xlsx]

## Sheet: Tabelle1
Figure 2A
days	Asm-wt - PBS				Asm-ko - PBS					Asm-wt - CD4-Depletion				Asm-ko CD4 Depletion
6	36.8	37.5	9.7	21.9	81	81	112.3	18	40.6	41.6	52.9	38.4	22.5	18	13.5	25	14.9
7	43.6	44	25.9	73.1	41.6	41.6	116.5	22.5	46.2	41.6	47.9	30.3	25.6	38.9	25.4	65	31.2
8	51.7	61.9	37.6	75.2	69.5	69.5	152.4	36.4	62.4	45.1	64.2	36.9	62.4	80.6	36.3	50.2	57.3
9	59.9	79.8	42	86.4	97.5	97.5	188.4	46.7	95.3	48.6	80.4	67.5	64	122.3	47.2	70.5	120.1
10	89.4	69.6			142.9	142.9	346.6			55	78.8			138.6	60.8
11	158.4	108.9			186.8	186.8	517.7			33.5	75.9			136.8	49.6
12	250.3	211.6	288	180	488.4	488.4	879.1	87.5	586.6	41.1	78.2	74.4	71.4	333.5	146.6	101.3	387.2
13	342.2	314.3	680.4	300.6	790	790	1240.6	205.8		48.6	80.4	153	111.8	530.2	243.7	194.9	645
Figure 2B
CD4+ of viable									CD8+ of viable									#CD8 TILs x10^4
WT dLn	KO dLN	WT dLN CD4 depletion	KO dLN CD4 depletion	WT Tumor	KO Tumor	WT TumorCD4 depletion	KO TumorCD4 depletion		WT dLn	KO dLN	WT dLN CD4 depletion	KO dLN CD4 depletion	WT Tumor	KO Tumor	WT TumorCD4 depletion	KO TumorCD4 depletion		WT Tumor	KO Tumor	WT TumorCD4 depletion	KO TumorCD4 depletion
41.4	33	0.1	0.2	12.4	8.6	0	0		25.4	20.5	51.4	35.3	6.1	8.4	44.9	17.5		1.3	0.11	5.565	7
25.3	33.9	0.1	0.2	10.4	15.3	0	0		26.5	22.3	51.8	31.9	5.2	10.1	63.1	9.5		1.6	1.6	12.15	0.9
25.2	30.4	6.8	0.6	5.4	10.2	0.1	0		26.1	18.6	56.4	39.2	3.7	4.5	63.8	40.1		0.9	1.75	8.56	1.12
38.5		0.1	5.4	6.2	8	0.6	2.7				37.2	34.2	5.5	5	73.2	16.6		1.56	3.52	19.89
		0.1	2.5			0.1	1.9
		0.1	0.1			0	0
		0.1	0.4			0.1	0.1
Figure 2C
Ifng of CD8+					CD44 of CD8+					granzymeb of CD8+
WT Tumor	KO Tumor	WT TumorCD4 depletion	KO TumorCD4 depletion		WT Tumor	KO Tumor	WT TumorCD4 depletion	KO TumorCD4 depletion		WT Tumor	KO Tumor	WT TumorCD4 depletion	KO TumorCD4 depletion
33.6	35.8	61.3	32.9		46.2	38.5	94.1	75.8		15.1	21.8	15.1	16.2
29.1	16.8	63.7	40.4		42.2	13.5	96.2	60.6		25.5	9.9	31.6	26.5
23	15.6	76.5	44.6		76.1	19.5	92.4	68		4.4	16.5	30.1	8.7
29.5	16.9	87.4	38.1		61.3	71.8	99.4	42		4.7	4.5	70	13.4
		70.2	57.3				98.5	60.1				62.4	37.4
		76.3	71.8				99.8	99.8				68.2
			40.5					74.8					32
