# Supplementary material for: Cell-intrinsic ceramides determine T cell function during melanoma progression
Source: eLife. 2022 Nov 25;11:e83073. doi: 10.7554/eLife.83073 (PMC9699697; doi:10.7554/eLife.83073)
Supplement: Figure 4—source data 1. [file elife-83073-fig4-data1.xlsx]

## Sheet: Tabelle1
Figure 4A
days	WT															Asm/CD4cre
7	15.7	20.3	32.4	11.4	16.5	0	21.5		45.5	112.7	24.3	56.7	20.4	12.2	16.5	44.5		24.5	51.9	30			35.2	57.4	14	72.6	35.2	26.1	46.6	47.6
8	16.275	24.25	59.85	19.45	34.725	2.45	22.275		75.1	118	26.3	59.6	37.6	13.3	23.1	61.45		41.5	121.325	47.975			44.225	89	15.8	116.6	35.2	14.9	48.6	59.6
9	17.425	32.15	114.75	35.55	71.175	7.35	23.825		93.8	298.1	37.9	48.5	50.6	15.6	28.7	95.35		75.5	260.175	83.925			62.275	152.2	60.7	154.8	61.9	30.5	63.4	88.4
10	18	36.1	142.2	43.6	89.4	9.8	24.6		205.35	366.1	70.7	62.45	77.7	19.5	34.2	112.3	30.6	92.5	329.6	101.9	22.9	22.3	71.3	183.8	146.8	304.3	187.55	92.45	105.1	113.8
11	20.55	39.7	307.75	69.9	151.3	20.5	48.15	15.4	316.9	434.1	103.5	76.4	104.8	38.1472	39.4209	131.6	71.3	72.9	352	222.4	51.9	27	157.1	299.9	232.9	453.8	313.2	154.4	177.821	195.773
12	23.1	43.3	473.3	96.2	213.2	31.2	71.7	50.6	428.45	502.05	136.25	90.35	131.9	75.5298	49.8176	306.1	188	129	598.2	246.4	88.9	37.8	231	321	318.95	603.3	438.85	216.4	323.352	359.791
13	18	41.6	599.4	135	321.5	29.4	98.3	52.7	540	570	169	104.3	159	94.2	55	346.3	236.8	245	580	525	148.1	100.9	402.7	525	405	752.8	564.5	278.4	396.1	441.8
14	50.3	50.4	965.4	170.6	525	60.8	102.1	87.9	584.3	627.3	176.4	161.6	186.6	108	103.5	349.8	296.4	296.5	550	726	343.2	171.5	600	661.5	479.2	758.4	600	303.2	430.6	500
Figure 4B
CD4 of viable					CD8 of viable					Foxp3 of CD4					dLN							Tumor
WT dLN	Asm/CD4cre dLN	WT Tumor	Asm/CD4cre Tumor		WT dLN	Asm/CD4cre dLN	WT Tumor	Asm/CD4cre Tumor		WT dLN	Asm/CD4cre dLN	WT Tumor	Asm/CD4cre Tumor		#CD4		#Tregs		#CD8			#CD4		#Tregs		#CD8
32.7	21.3	20.3	12.8		11.6	15.4	13.3	57.9		28.9	22	9.1	5		WT	Asm/CD4cre	WT	Asm/CD4cre	WT	Asm/CD4cre		WT	Asm/CD4cre	WT	Asm/CD4cre	WT	Asm/CD4cre
30.2	27.5	12.5	12.6		14.5	13.9	25.7	51.6		27.4	26.5	19.3	3.7		985710	468000	109414	70668	917730	446000		30294	516.6	6331.45	233.503	29727	680.4
35.9	27.3	16.1	13.3		10.9	13.1	29.4	47.1		28.7	26.7	9.9	5.3		861360	747460	124036	100907	816960	712880		3002.4	3224	687.55	1373.42	5853.6	2132
33.2	18.5	11.4	8.8		10.3	15.5	28.5	51.7		27.7	20.9	5.6	9.2		1197070	738400	129284	97468.8	1005120	699400		51622	1567.8	13318.5	774.493	30316	1809
28.1	24.4	4	4		15.3	12.3	24.2	15.6		24.2	23.1	2.3	3.7		1020740	345720	102074	53586.6	901600	364640		469.2	1362.9	115.423	643.289	448.8	3593.1
24.4	29.5	1.2	5.7		15.8	11.9	18.4	33		26.5	30.6	1.4	6.2		768240	585000	112163	67860	633600	517500		146.2	188.7	34.5032	28.8711	180.6	543.9
16.1	19.6	4.2	2.4		11.4	11.7	38.8	34.9		24.7	20.1	2.5	3.7		568080	761100	53399.5	86765.4	460080	789480		1313	514.5	262.6	173.387	1144	1822.8
21.2	22	6.5	8.4		11.7	12.3	29.1	32.3		25.3	22.8	6.9	9.9		528580	408960	77701.3	45803.5	502900	528960		4929	592.2	985.8	524.53	3948.5	5032.8
29.9	26.7	2.6	7.7		9.9	9.7	8.5	23.3		29.8	28	2.9	11.3		628790	542880	82371.5	63517	547070	656080		2430.8	1561.1	28.782	203.197	2925.2	6441
27.7	25.6	2.7	1.5		9.5	10.2	19.6	16.6		31.3	26.9	3	1.7		201600	667880	31449.6	62112.8	337400	526680		140.4	610.2	42.2982	25.8129	324	202.1
32.2	26.4	14.9	2.1		16.9	11.2	24.4	31		29	19.4	8.2	3.2		376200	451440	45144	47401.2	459800	357200		113.4	98.9	106.029	34.41	126	218.3
31.4	19.1	11.3	2.6		16.5	19.1	23.8	21.4		27.5	21.9	2.8	1.2		629970	368480	76856.3	41269.8	582660	278000		346.5	92.5	13.392	4.0716	723.8	10.4
28.6	25.7		2.7		13.2	13.2	22.7	37			28.6		2.8		561600	202940	56160	39167.4	655200			124	11.7	51.7707	66.8288	192	492.8
	31.3		8.4		11.5	14.6	25.2	35.5			31		6.5		867280	521820	84993.4	66271.1	837980	590950		250.1	294.4	1650.3	78.706	427	707.6
	22.4		7.7		9.7	11.9	16.4	42.2			25.2		3.9		1030400	1046520	134982	133955	908800	978690		5206	684.4	29.04	11.9472	3288	100.8
					9.8	16.2	21.3	9.7							823680	528960	89781.1	67177.9	760760	565440		165	91.2			52.8
					10.7	10.9	21.7	12.8
					13.2	11.4	27.8	26.3
						14		25.2
						13.9		21
						16
Figure 4C
Ifng of CD4		ifng of CD8			tnfa of CD4		tnfa of CD8			grzmb of CD8			MFI grzmb of CD8
WT	Asm/CD4cre	WT	Asm/CD4cre		WT	Asm/CD4cre	WT	Asm/CD4cre		WT	Asm/CD4cre		WT	Asm/CD4cre
60.8	19.6	51.4	52.7		64.7	26.2	54.1	33.3		4.4	5.2		208	266
47.2	15.2	82.6	43.6		54.7	15.9	65.2	18.2		20	10		515	275
66.7	14	33.3	47.9		83.3	24.9	33.3	22.3		27.8	27.7		617	618
32.3	9.3	39	36.5		27.4	8.3	29.3	12.5		29.6	39.1		431	336
28.8	27.4	21.1	22.1		15.9	18.2	35.4	40.2		19.6	9.5		208	530
19.7	29	22	31.6		12.3	22.9	28.7	42.2		19.2	12.2		515	266
38.3	31.6	42.7	39.9		33.5	24.3	51.5	46.8		28.4	10.5		617	275
33.2	32.4	40.9	32.7		28.3	25.4	62.3	50.2		8.8	15.6		431	336
30.9	9.4	51.4	8.8		27.7	9.4	58	2.8		35.8	4.9		1175	530
35.9	8.7	57.3	6.3		52.5	8.7	38.2	1.8		31.9	53.8		1047	555
25.5		27			37.7		27			9.5	9.5		1443	434
										16.2	36.9		430	328
										7.9	8.2			642
MFI Ifng of CD4		MFI ifng of CD8			MFI tnfa of CD4		MFI tnfa of CD8
WT	Asm/CD4cre	WT	Asm/CD4cre		WT	Asm/CD4cre	WT	Asm/CD4cre
1371	459	795	1263		1979	775	1107	657
1216	236	1627	436		2717	440	1249	400
2525	252	664	583		2477	568	873	437
813	109	904	542		882	311	578	237
769	1572	782	750		391	429	421	533
799	822	634	893		351	419	314	449
5746	1247	1554	1070		1497	344	824	840
		1787	1648		554	689	1139	735
3560	2642	2374	1269		1031	288	1029	142
1531	304	2348	281		1573	312	935	121
1784	588	1037	212		1469		768
