# Supplementary material for: Cell-intrinsic ceramides determine T cell function during melanoma progression
Source: eLife. 2022 Nov 25;11:e83073. doi: 10.7554/eLife.83073 (PMC9699697; doi:10.7554/eLife.83073)
Supplement: Figure 7—source data 1. [file elife-83073-fig7-data1.xlsx]

## Sheet: Tabelle1
Asm/CD4cre	Ac/CD4cre
1.32258	8.29787
1.37721	3.73585
2.81038	1.50128
0.466791	1.48459
5.34657	1.53962
1.88488	1.23225
1.31812	1.81884
3.36456	8.20379
1.15909	6.48276
3.69215	3.26659
5.67512	5.4
3.32315	6.81579
0.517205	4.91566
1.67158	12.2893
1.81254	3.46745
1.06127	6.33333
6.7931	4.98269
1.47619	3.80311
2.00797	9.90476
3.70221	4.25926
4.95028	3.39286
5.19677	5.04811
2.72117	6.41241
4.16245	17.6568
5.73514	2.43337
1.19427	7.04878
1.03883	10.2963
1.24883	4.09704
2.41243	6.22314
3.93848	3.93651
1.68787	4.3714
0.527778	6.41667
4.75815	4.32899
5.01478	10.3636
1.50982	18.9175
3.19038
2.20773
1.57521
2.96912
2.18794
1.25535
0.333333
6.98802
0.791389
1.25726
