# Supplementary material for: Cell-intrinsic ceramides determine T cell function during melanoma progression
Source: eLife. 2022 Nov 25;11:e83073. doi: 10.7554/eLife.83073 (PMC9699697; doi:10.7554/eLife.83073)
Supplement: Figure 8—source data 1. [file elife-83073-fig8-data1.xlsx]

## Sheet: Tabelle1
Figure 7A
days	WT								Ac/CD4cre
7	56.4	40.3	66	42.4	60.7	38.6	20.2	22.5	18	96.3	31.9	32.8	46.7	3.6	8.6	33.9	6.8	23.5
8	66.3	109.7	123.6	71.4	100.9	32.1	41.7	39.6	40.6	162	37.9	28.2	84	10.6	7.7	51.4	9.1	32.8
9	68.8	157.1	180.3	120.7	141.3	49.7	68.2	73.3	57.6	178.6	43.2	34.5	130	10.5	16.4	76.9	10.6	51.3
10	133	162.7	260.9	113.6	295.9	75.7	100.2	117	89.2	291.2	78	45.6	202.6	2.8	17.8	71.5	24.8	57.5
11	172.8	249	316.8	195.3	314	86.4	186.8	166.9	193.6	410.5	76	50.6	271.8	4.8	26.6	104.3	33.2	107.3
12	266.8	561.1	344.5	202	453.6	108.3	279.3	279.7	230.6	531.9	102.8	66.3	413.3	5.3	52.4	158.8	36.4	156.7
13	292	670.7	540.6	240.4	514.6	160.5	352	298.1	404.6	804.8	139.2	107.2	810.6	4.6	29.7	171.2	41.3	168.2
15	504.7	1350.5	670	286	602.1	340.9	593.5	569.8	526.6	1057.4	155.5	122.7	856.6	19.4	56.9	311.7	64.5	326.2
16	803.8	1477.8	705.5	318.3	736.9	439.9	794	690.1	616.5	1333	344.2	90.8	1061.3	26.9	74.3	498.6	93.5	354.2
17	1074.2	1533.7	897	457.1	1214.7	526.7	662.9	941.7	850	1372.9	365.1	234.5	1317.2	35.2	65.3	620.6	143.4	445.5
18	1254.5	2218.4	921.5	710.6	1306.4	1345.6	949.4	998.4	1058.8	1253.1	480.1	287.5	1466.4	62.5	50.4	758.2	151	486.7
Figure 7B
T cells of viable lymphocytes [%]							TILs [# x10^4]
CD4+		Foxp3+ of CD4+		CD8+			CD4+		Tregs		CD8+
WT	Ac/CD4cre	WT	Ac/CD4cre	WT	Ac/CD4cre		WT	Ac/CD4cre	WT	Ac/CD4cre	WT	Ac/CD4cre
10.2	10.8	42.8	29.1	7.2	9.5		168	165	70.224	52.305	120.96	165
8.2	12.9	37.6	33.9	2.8	6		211.42	15.165	109.093	4.459	230.64	8.46
8.4	11.3	35.6	34.4	2.8	5.1		108.78	120.15	63.31	37.607	35.77	92.7
11.5	9.9	24.6	44.4	8.2	7.4		198.36	178.56	29.754	39.105	128.82	110.98
5.6	8.1	11	27.5	6.7	7.4		71.94	24.32	10.431	5.302	194.02	48.26
12.8	14.7	9.6	46.3	12	6.6		121.72	105.9	14.85	15.038	184.96	30.3
6.2	12.3	53.8	13.3	3.3	17.6		70.98	83.82	28.392	11.735	42.12	139.26
6.9	13.6	19.3	48.9	7	9.1		68.82	227.62	11.699	38.468	114.08	93.48
	8.4		17.7		9.6			46.9		8.254		68.6
Figure 7C
IFN-g+ of TILs [%]					Granzyme B+ of TILs [%]
CD4+		CD8+			CD4+		CD8+
WT	Ac/CD4cre	WT	Ac/CD4cre		WT	Ac/CD4cre	WT	Ac/CD4cre
8.7	7.7	15.2	13.3		11.3	18.8	13.3	24
11.7	26.8	26.4	11.9		4.3	11	8.4	14
14.7	10.8	5.4	16.1		3.1	24.2	2.8	22.2
8	16.8	13	39.3		12.1	16.9	9.2	22.5
9.3	18.3	4.8	10.8		7.2	4.7	11.3	11.5
6	6.3	15.7	13.4		2.7	6.7	17.8	14.8
8.5	14.6	16.9	24.1		10.6	7.9	10.9	35.6
8.4	24.1	12.1	11.3		6.1	4.7	3.2	14.2
						6.2		20.2
